# Supplementary material
Source: HighWire-hosted journal article supplement (https://ajnr-sso.highwirestaging.com/highwire/filestream/77726/field_highwire_adjunct_files/0/20-00078.pdf)
Supplement: 20-00078.pdf [file 20-00078.pdf]

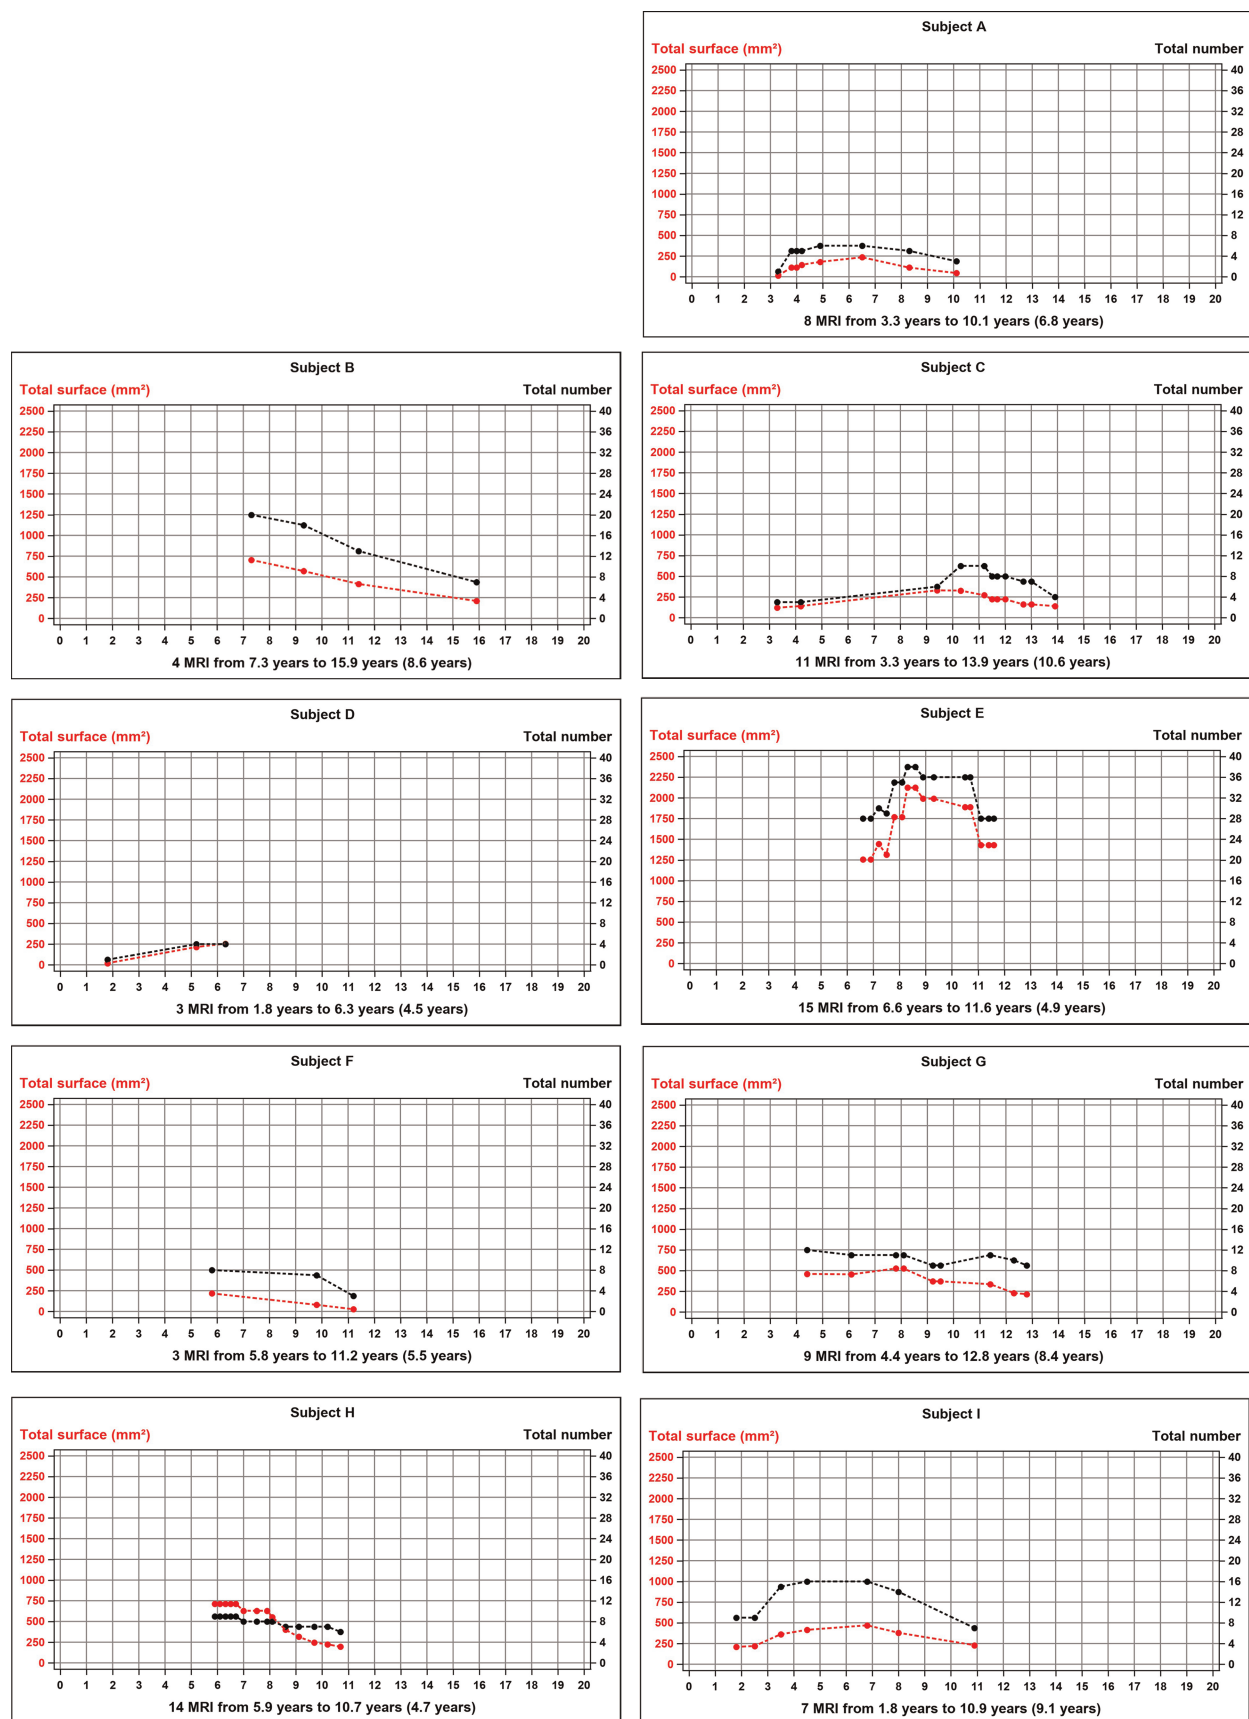

**ON-LINE FIGURE.** Temporal evolution of FASI per patient, *Line plots (dashed lines)* of total FASI surface area (red for girls, blue for boys) and total FASI number (black) for each patient. X-axis represents age, the left y-axis represents the surface area in square millimeters, and the right y-axis represents the number of FASI. Letters of the subjects (*uppercase letters for female, lowercase letters for male*) match those used in Fig 2.

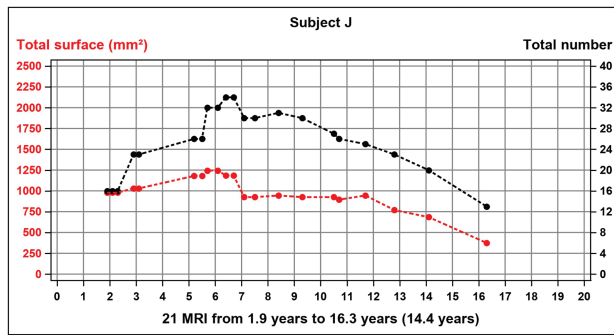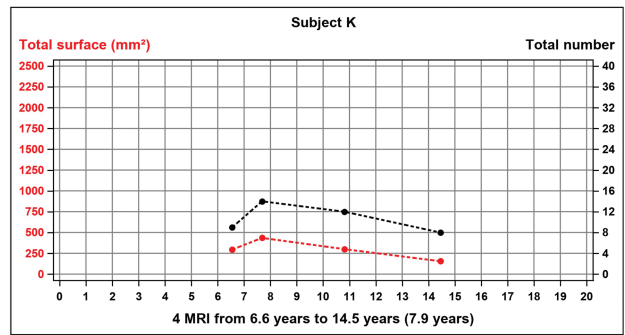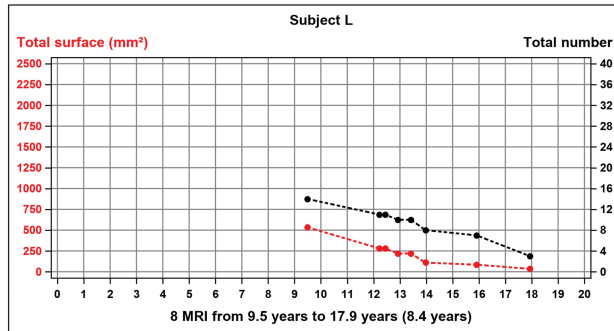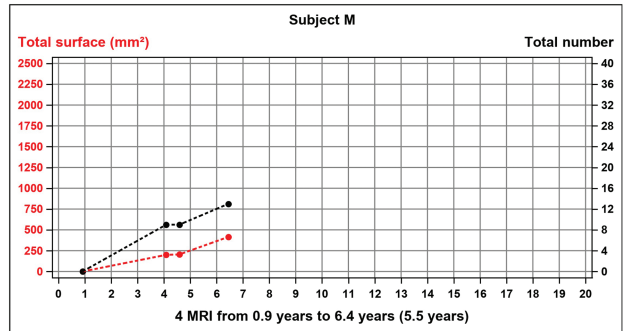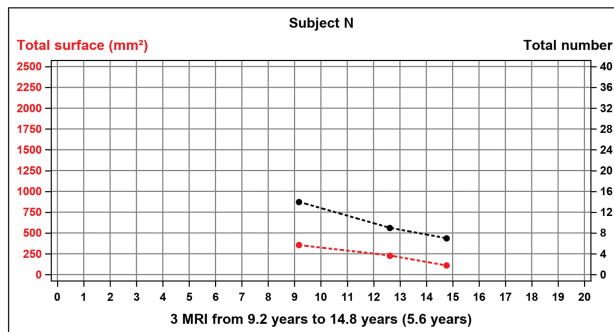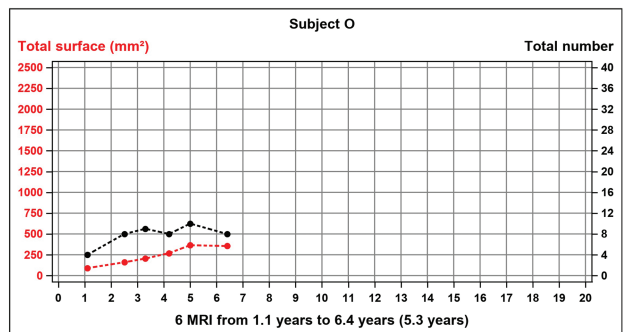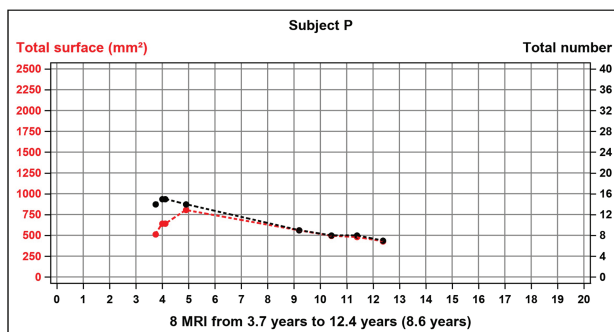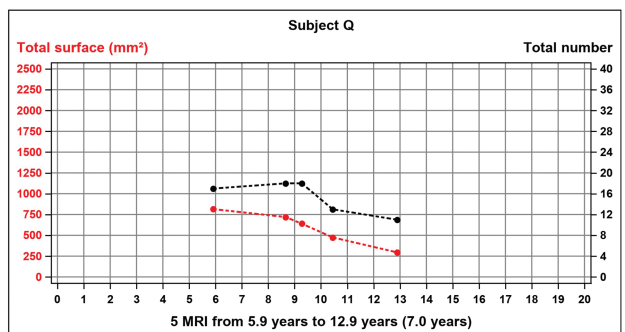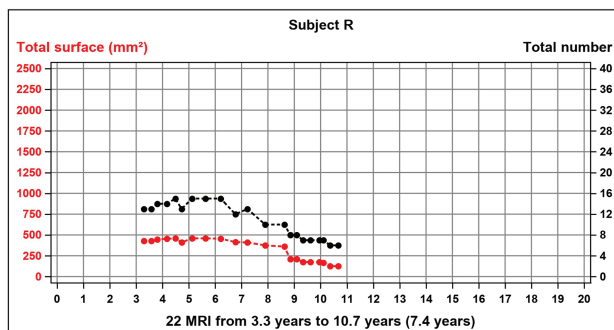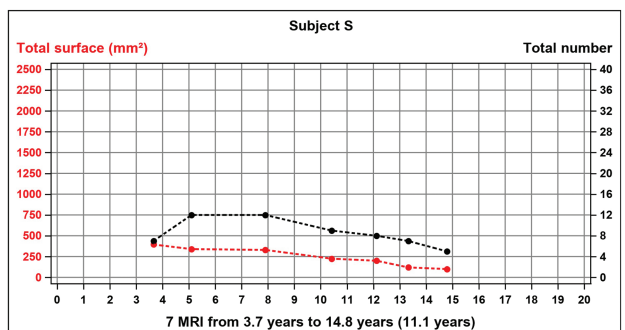

ON-LINE FIGURE. Continued

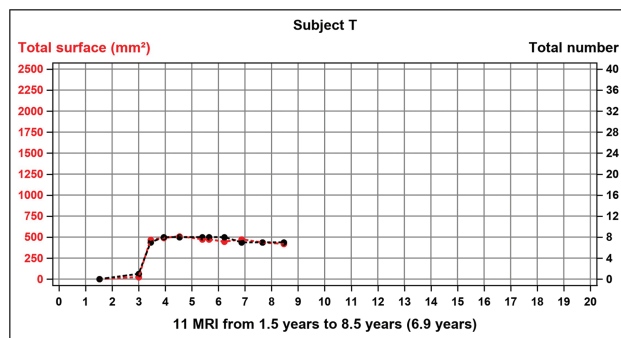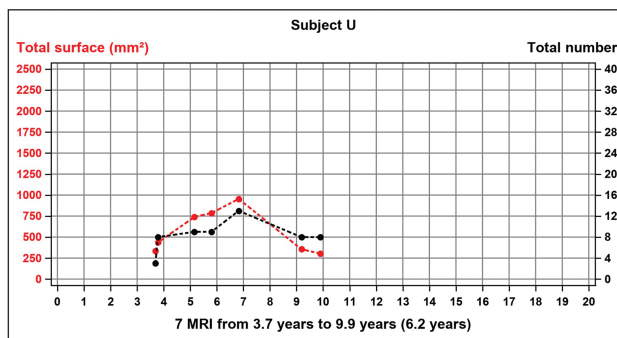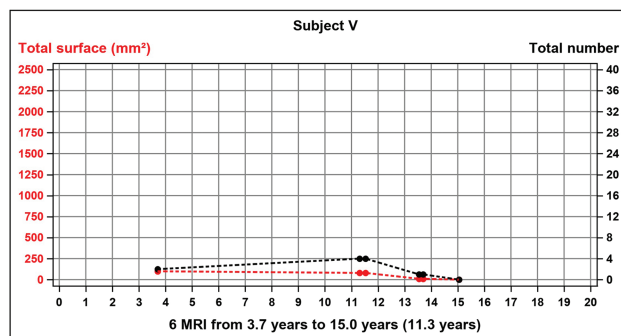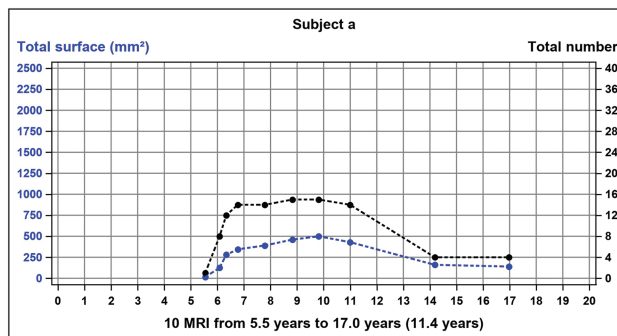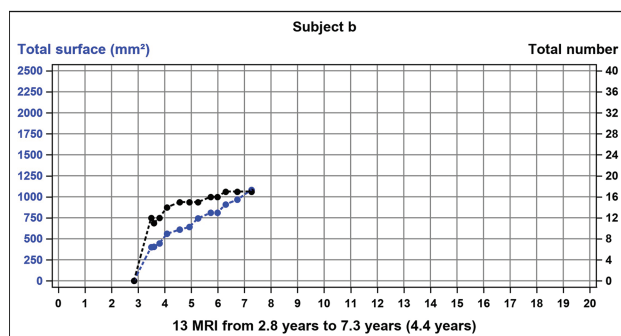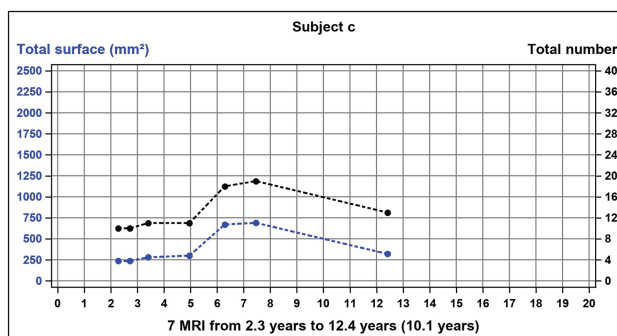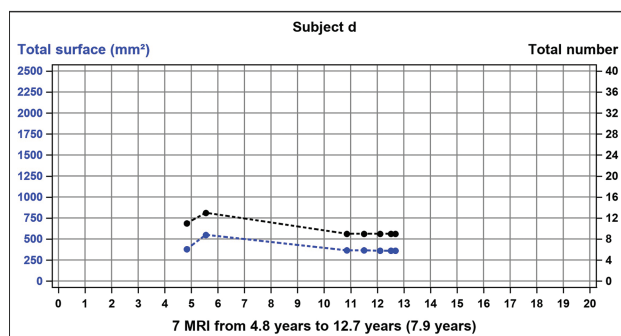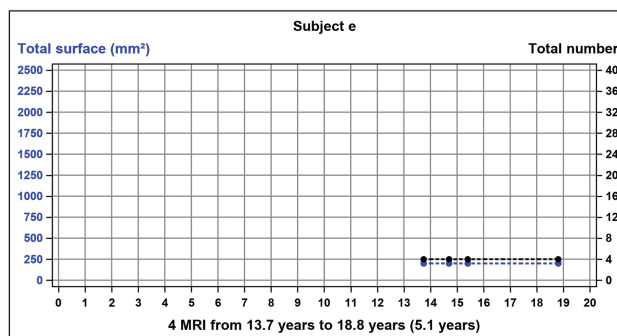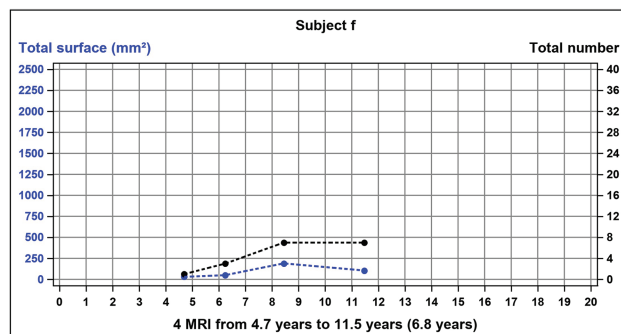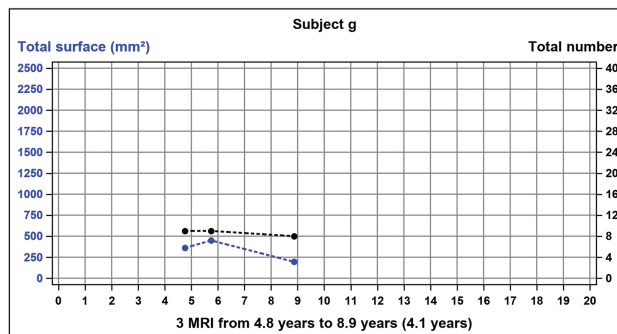

ON-LINE FIGURE. Continued

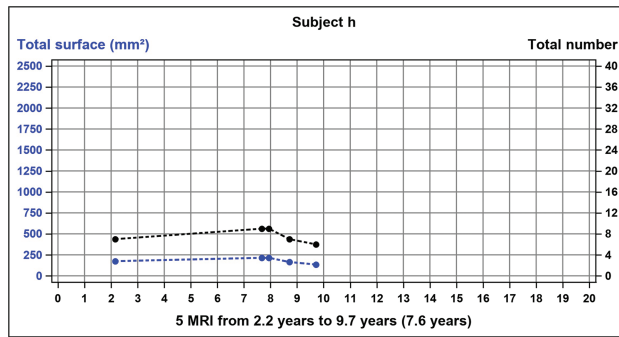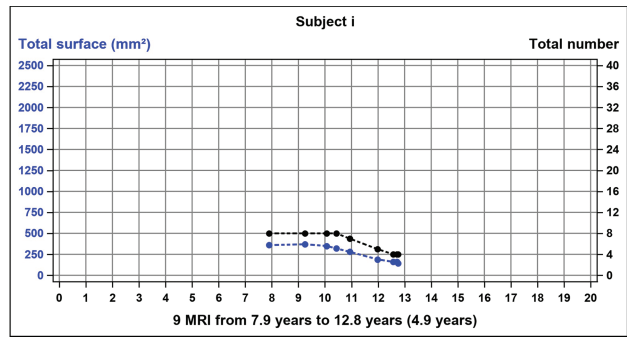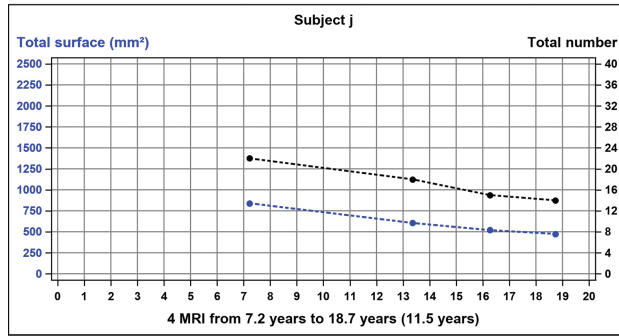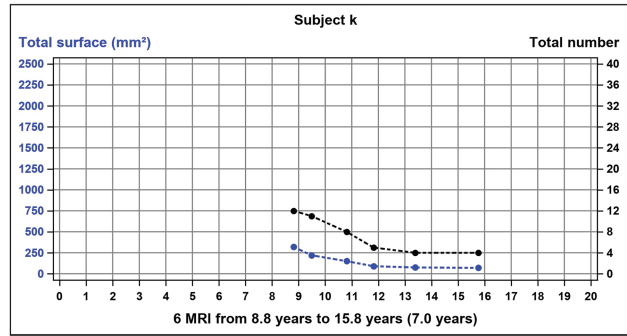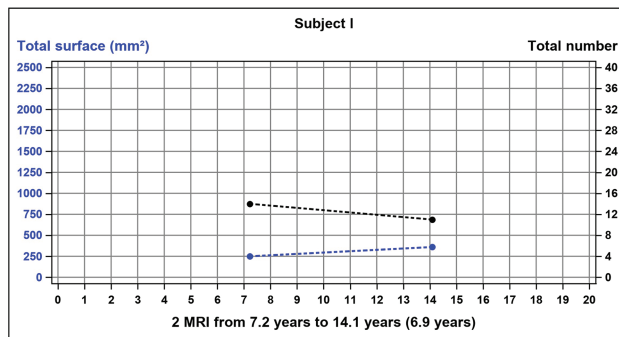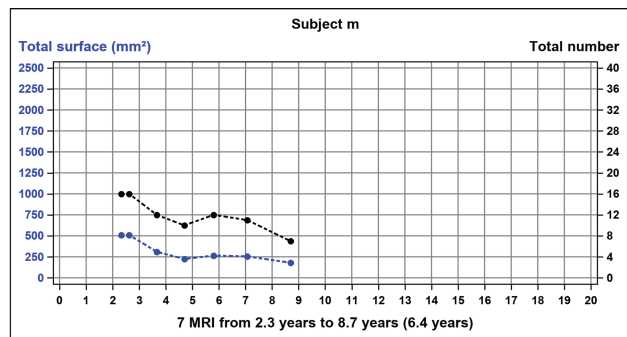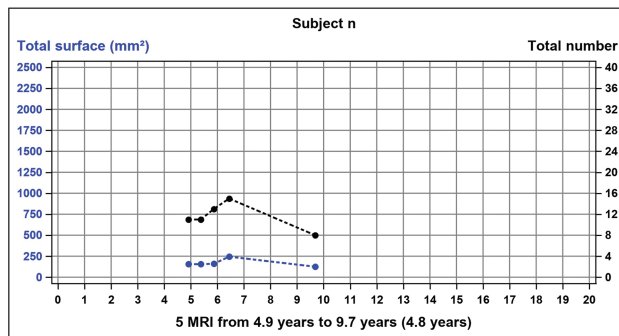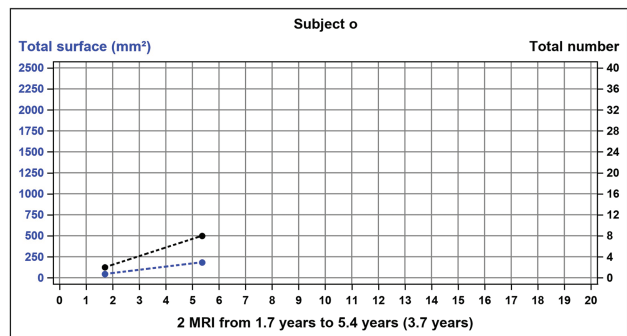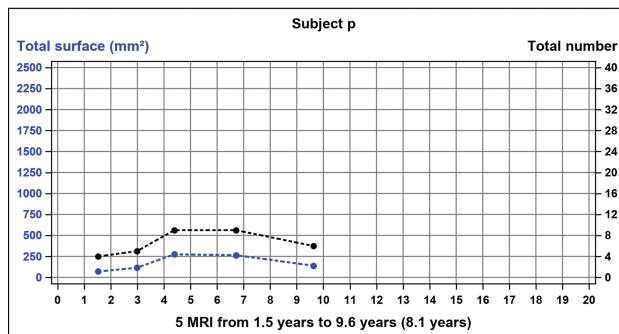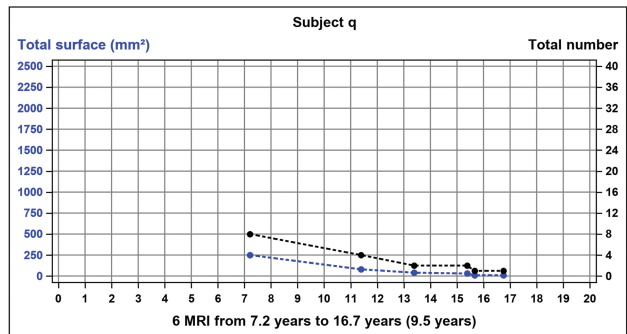

ON-LINE FIGURE. Continued
